# Supplementary material for: The Effect of Work Characteristics on Advanced Practice Provider Burnout: a secondary cross-sectional analysis
Source: Research Square preprint supplement (doi:10.21203/rs.3.rs-8437047/v1), 2026-01-19
Supplement: Supplementary file 1 [file 0ab0c711e98103fe2e0b3aaa.docx]

Supplemental:

Scoring and Cleaning of Outcomes:

MBI Burnout Continuous Outcomes: Per the MBI Scoring guide we chose to create the following variable: Emotional Exhaustion, Depersonalization and Personal Achievement by taking the average of their respected items. Emotional Exhaustion (EE) was created by taking the average of MBI Items 1, 2, 3, 6, 8, 13, 14, 16, and 20. While Depersonalization (DEP) was the average of MBI Items 5, 10, 11, 15, and 22. Personal Achievement (PA) was determined by the average of MBI items 4, 7, 9, 12, 17, 18, 19, and 21.

MBI Burnout Profile (Ordinal) Outcome: Profiles were determined using the guidance offered by the MBI Scoring guide using the approach explored by Leiter and Maslach (2016). The following thresholds were calculated to determine our samples burnout profiles.

EE Threshold = mean (EE) + (standard deviation (EE)*0.5)

DEP Threshold = mean (DEP) + (standard deviation (DEP)*1.25)

PA Threshold = mean (PA) + (standard deviation (PA)*0.1)

Engaged was defined by having an EE ≤ EE Threshold, DEP ≤ DEP Threshold, and PA > PA Threshold.

Ineffective was defined by having an EE ≤ EE Threshold, DEP ≤ DEP Threshold, and PA ≤ PA Threshold. Overextended was defined by having an EE > EE Threshold and DEP ≤ DEP Threshold. Disengaged was defined by having an EE ≤ EE Threshold and DEP > DEP Threshold. Burnout was defined by having an EE > EE Threshold and DEP > DEP Threshold.

Appendix 1: Maslach Burnout Inventory Domain Threshold Calculation.

| Domain | Threshold Calculation | Our Samples Threshold |
| --- | --- | --- |
| Emotional Exhaustion (EE) Threshold | Mean (EE) + (Standard Deviation (EE) *0.5) | 3.41 |
| Depersonalization (DP) Threshold | Mean (DP) + (Standard Deviation (DP) *1.25) | 3.88 |
| Personal Achievement (PA) Threshold | Mean (PA) + (Standard Deviation (PA) *0.1) | 4.54 |

Appendix 2: MBI Latent Profiles

| Engaged | EE <= EE Threshold | DP <= DP Threshold | PA > PA Threshold |
| --- | --- | --- | --- |
| Ineffective | EE <= EE Threshold | DP <= DP Threshold | PA <= PA Threshold |
| Overextended | EE > EE Threshold | DP <= DP Threshold | - |
| Disengaged | EE <= EE Threshold | DP > DP Threshold | - |
| Burnout | EE > EE Threshold | DP > DP Threshold | - |

Appendix 3: Univariate Analysis of Outcomes and Predictors

|  |  | Linear Regression |  | Ordinal Regression |
| --- | --- | --- | --- | --- |
| Characteristics | Emotional Exhaustion | Depersonalization | Personal Achievement | Burnout Profiles (3- levels) |
|  | Beta (95% CI) | Beta (95% CI) | Beta (95% CI) | OR (95% CI) |
| **Primary Caregiver** |  |  |  |  |
| *Not a Caregiver* |  |  |  |  |
| *Caregiver* | 0.09 (-0.38, 0.19) | -0.33 (-0.62, 0.04)* | 0.15 (-0.04, 0.34) | 0.71 (0.44, 1.1) |
| **Marital Status** |  |  |  |  |
| *Married/Engaged/Partnered* |  |  |  |  |
| *Single/Divorced* | 0.21 (-0.11, 0.52) | 0.16 (-0.17, 0.49) | -0.09(-0.30,0.12) | 1.1(0.68,1.9) |
| **Weekly Overtime** |  |  |  |  |
| *Monthly/Yearly/Never* |  |  |  |  |
| *Weekly* | 0.17 (-0.23, 0.58) | -0.02 (-0.44, 0.40) | 0.25 (-0.02, 0.52) | 1.1 (0.57, 2.1) |
| **Employment Status** |  |  |  |  |
| *Part-Time/PRN* |  |  |  |  |
| *Full-Time* | -0.52 (-0.92, -0.12)* | -0.27 (-0.69, 0.15) | -0.32(-0.59, -0.05)* | 1.2 (0.61, 2.2) |
| **APP Type** |  |  |  |  |
| *Advanced Practice Nurse* |  |  |  |  |
| *Physician Assistant* | 0.32 (-0.04, 0.61)* | 0.53 (0.24, 0.83)* | -0.06(-0.26, 0.13) | 1.7 (1.0, 2.7) |
| **Years of Experience** |  |  |  |  |
| *0-5 years* |  |  |  |  |
| *6+ years* | 0.06 (-0.24, 0.36) | 0.07 (-0.24, 0.38) | 0.19(-0.01, 0.39) | 0.92 (0.57, 1.5) |
| **Type of Specialty** |  |  |  |  |
| *Surgical Field* |  |  |  |  |
| *Medical Field* | -0.16 (-0.51, 0.18) | -0.43 (-0.79, -0.07)* | 0.18 (-0.05, 0.41) | 0.54 (0.31, 0.95)* |
| **Patient Population** |  |  |  |  |
| *Pediatric Patient Population* |  |  |  |  |
| *Adult Patient Population* | 0.56 (0.29, 0.83)* | 0.53 (0.24, 0.81)* | 0.01 (0.20, 0.18) | 2.1 (1.3, 3.3)* |
| **Work Shift** |  |  |  |  |
| *Day Shift* |  |  |  |  |
| *Off Shift* | 0.00 (0.28, 0.83) | 0.18 (-0.11, 0.48) | -0.32(-0.50, -0.13)* | 1.9 (1.2, 3.0)* |
| **Work Setting** |  |  |  |  |
| *Outpatient* |  |  |  |  |
| *Hospital Based* | -0.25 (-0.55, 0.05) | -0.08(-0.39, 0.24) | -0.32 (-0.52, -0.13)* | 1.1 (0.68, 1.8) |
| **State of Work** |  |  |  |  |
| Georgia |  |  |  |  |
| Colorado | 0.24 (-0.03, 0.52) | 0.21 (-0.08, 0.50) | 0.03 (-0.15, 0.22) | 1.5 (0.94, 2.3) |
|  |  |  |  |  |

Abbreviations: CI = Confidence Interval, OR = Odds Ratio

*Indicates statistically significant value
